# Supplementary material for: Use of Extracorporeal Membrane Oxygenation in Traumatic Injuries With Acute Respiratory Distress Syndrome: A Systematic Review And Meta-analysis
Source: Research Square preprint supplement (doi:10.21203/rs.3.rs-6951549/v1), 2025-07-03
Supplement: Supplementary file 2 [file 79b4a500b9288ce8c6d3efce.docx]

**Embase:** ('extracorporeal membrane oxygenation'/exp OR 'ecmo':ti,ab OR 'extracorporeal life support':ti,ab) AND ('thoracic injury'/exp OR 'thoracic trauma':ti,ab OR 'blunt chest trauma':ti,ab OR 'penetrating chest trauma':ti,ab OR 'chest injury':ti,ab OR 'chest trauma':ti,ab OR 'severe chest injury':ti,ab) AND ('acute respiratory distress syndrome'/exp OR 'ards':ti,ab OR 'respiratory failure':ti,ab OR 'severe hypoxemia':ti,ab)

**Pubmed :** ("Extracorporeal Membrane Oxygenation" OR "ECMO" OR "Extracorporeal Life Support")

AND

("Thoracic Injuries" OR "Thoracic Trauma" OR "Blunt Chest Trauma" OR "Penetrating Chest Trauma" OR "Chest Injury" OR "Chest Trauma" OR "Severe Chest Injury")

AND

("Acute Respiratory Distress Syndrome" OR "ARDS" OR "Respiratory Failure" OR "Severe Hypoxemia")

**Cochrane** : ('extracorporeal membrane oxygenation'/exp OR 'ecmo' OR 'extracorporeal life support') AND ('thoracic injury'/exp OR 'thoracic trauma' OR 'blunt chest trauma' OR 'penetrating chest trauma' OR 'chest injury' OR 'chest trauma' OR 'severe chest injury') AND ('acute respiratory distress syndrome' OR 'ards' OR 'respiratory failure' OR 'severe hypoxemia')

Pubmed: 58

Embase: 786

Cochrane: 36

Total = 880

Duplicates = 37

After removing duplicates = 843
