# Supplementary figures and images for: Use of Extracorporeal Membrane Oxygenation in Traumatic Injuries With Acute Respiratory Distress Syndrome: A Systematic Review And Meta-analysis
Source: Research Square preprint supplement (doi:10.21203/rs.3.rs-6951549/v1), 2025-07-03

a)

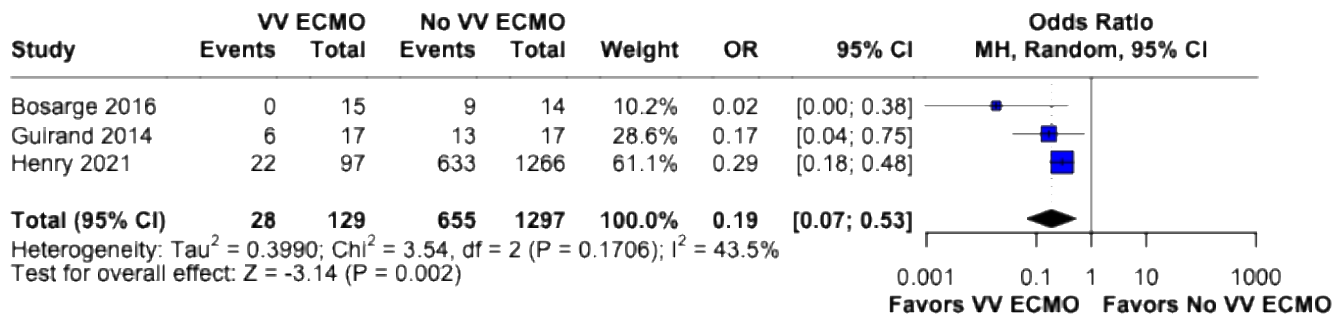

b)

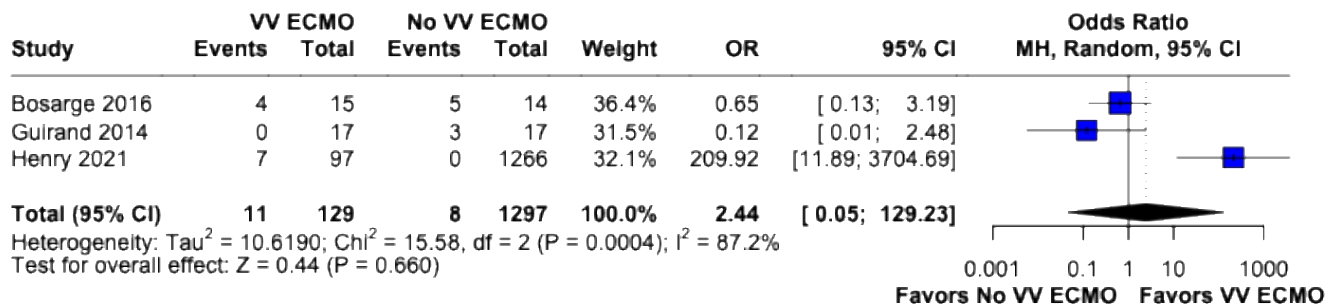

c)

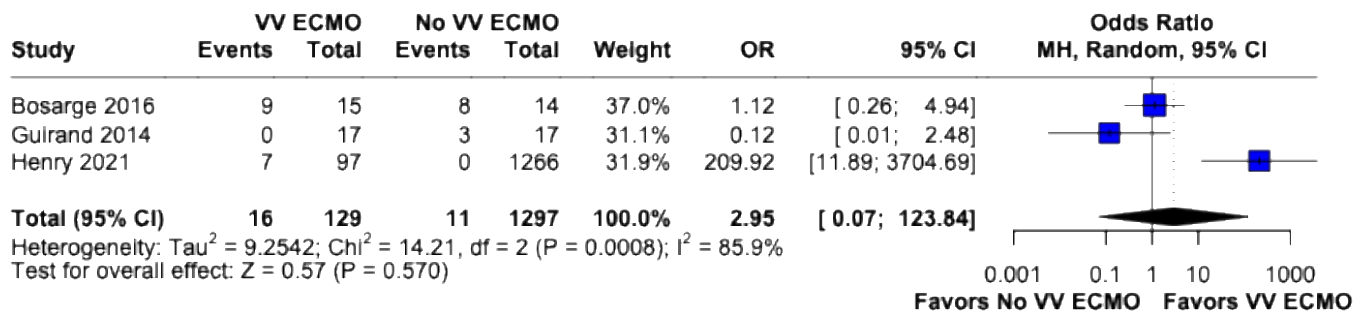

Supplement: Supplementary file 1 [file 7131cbe315e89108996271b7.pdf]
